# Supplementary material for: Unbiased classification of mosquito blood cells by single-cell genomics and high-content imaging
Source: PubMed Central journal article supplement — Proc Natl Acad Sci U S A. 2018 Jul 23;115(32):E7568–77. doi: 10.1073/pnas.1803062115 (PMC6094101; doi:10.1073/pnas.1803062115), 2018-07-23
Supplement: pnas.1803062115.sapp.pdf [file pnas.1803062115.sapp.pdf]

Supplementary Information for

**Unbiased classification of mosquito blood cells by single-cell genomics and high-content imaging**

Maiara S. Severo, Jonathan J.M. Landry, Randall L. Lindquist, Christian Goosmann, Volker Brinkmann, Paul Collier, Anja E. Hauser, Vladimir Benes, Johan Henriksson, Sarah A. Teichmann, Elena A. Levashina

Elena A. Levashina

Email: [levashina@mpiib-berlin.mpg.de](mailto:levashina@mpiib-berlin.mpg.de)

**This PDF file includes:**

Figs. S1 to S6

Tables S1 and S2

**Other supplementary materials for this manuscript include the following:**

Datasets S1 to S7

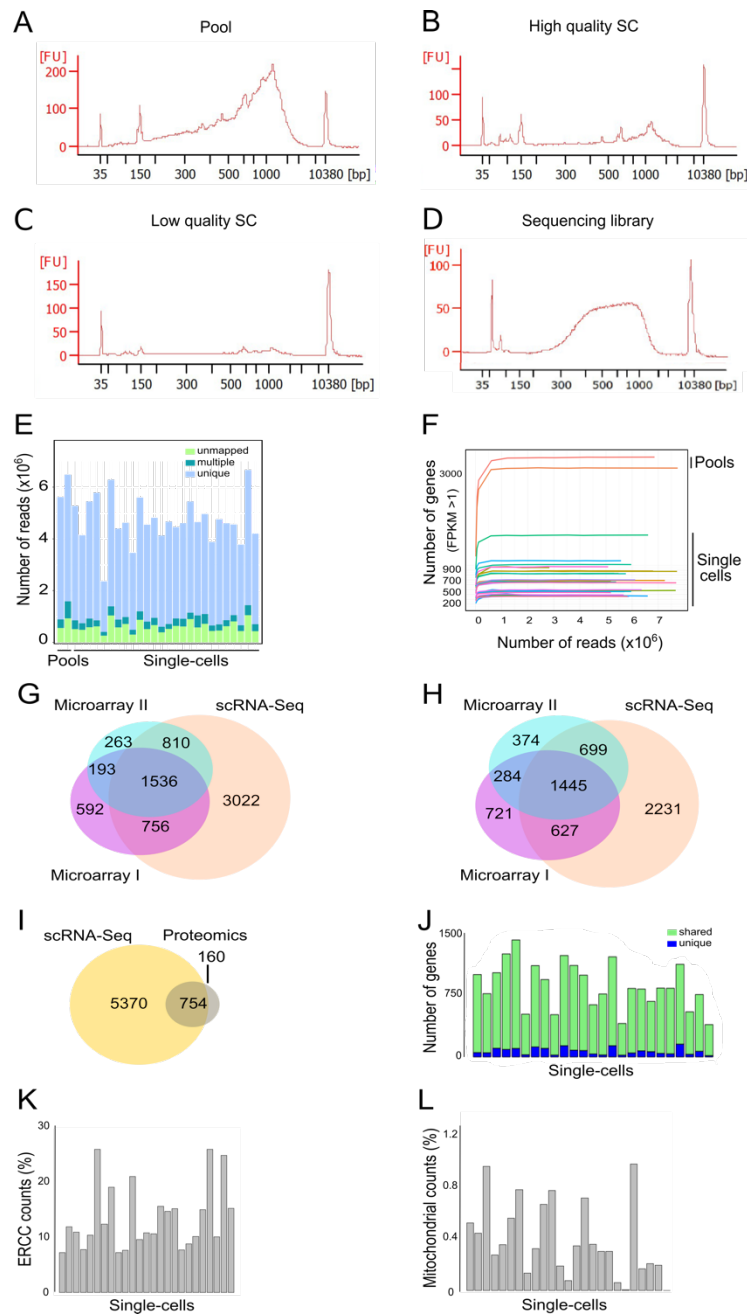

**Figure S1: Quality assessment of scRNA-seq of mosquito blood cells.** Related to Figure 1. (A-D) Representative electropherograms (Bioanalyzer) of pre-amplified cDNAs and cDNA library from *A. gambiae* RFP-positive hemocytes. (A) Representative graph of the cDNA size distribution obtained from a successful cDNA preamplification from 30 RFP-positive hemocytes (pool). (B-C) Representative graphs of a (B) high and (C) low quality cDNA profile from a single RFP-positive hemocyte. (D) Representative DNA library. (E) Read mapping distribution of sequences obtained with our scRNA-seq approach. (F) Saturation curves generated by randomly selecting a given number of raw reads from each library. Comparison of genes detected (normalized count  $\geq 1$ ) in our scRNA-seq and previous (G-H) microarray and (I)

proteomics studies. In (H), only genes identified in the pool samples were used for comparison. (J) Distribution of unique and shared genes across single-cell samples. Percentages of (I) ERCCs and (J) mitochondrial counts in single-cells. Microarray I: Dataset from Baton et al, 2009. Microarray II: Dataset from Pinto et al, 2009.

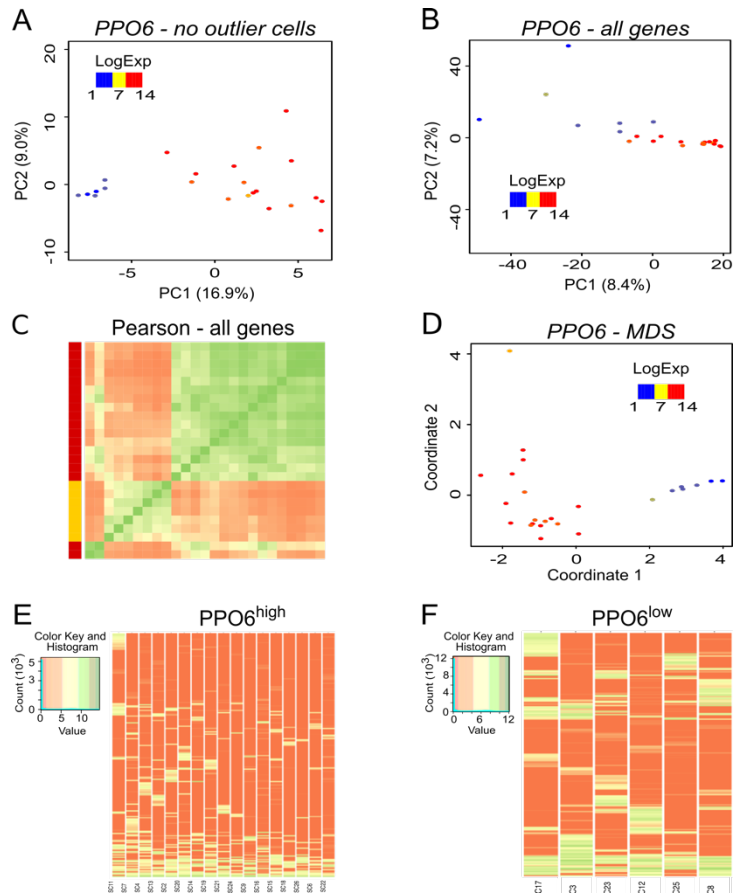

**Figure S2: PPO6 cell populations exhibit intra-population heterogeneity.** PCA plot based on the expression of (A) highly variable genes in the absence of the outlier cells identified in Figure 2C. A PCA plot (B) and a Pearson correlation heatmap (C) based on all identified genes are shown. Color bar indicates the groups identified in Figure 2. (D) A MDS plot based on the expression of the *PPO* genes identified in the scRNA-Seq. The first two principal components or coordinates are shown, and each point represents one single hemocyte. *PPO6* expression, as  $\log_{10}$  (normalized counts +1), is overlaid onto the PCA and MDS plots. Heatmap of genes identified in at least one cell in either  $PPO6^{\text{high}}$  (E) or  $PPO6^{\text{low}}$  (F) cell populations.

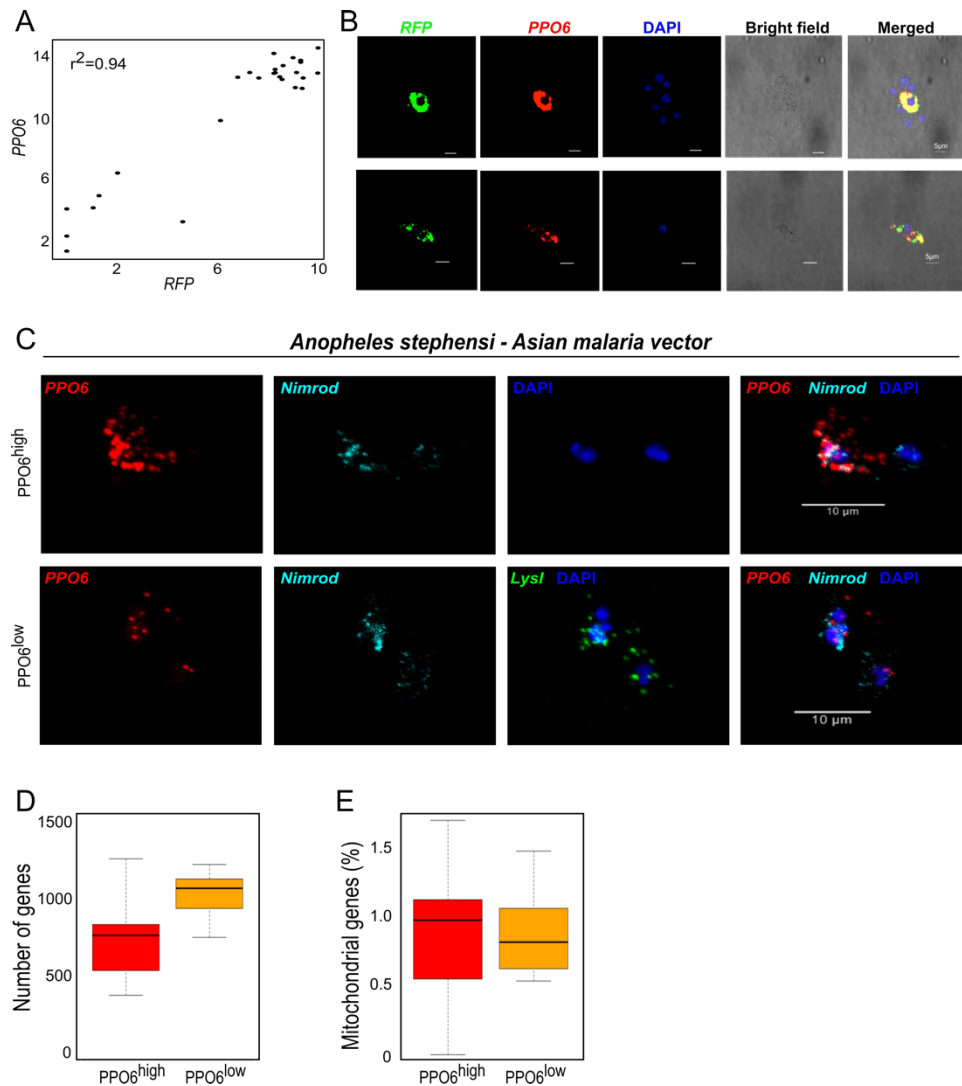

**Figure S3: Gene expression analyses of blood cells from *PPO6::RFP* and *Anopheles stephensi* mosquitoes, and transcriptional characteristics of *PPO6* cell subpopulations.** Related to Figures 2 and 3. (A) Scatter plot of expression of *RFP* and *PPO6* (log normalized counts + 1) in single-cells.  $r^2$  indicates the Pearson correlation. (B) RNA-FISH validation of *RFP* expression in *PPO6::RFP* mosquitoes. (C) Similar patterns of expression of the identified cell-type markers for *PPO6* populations are observed in the Asian mosquito vector, *A. stephensi*. Scale bars: (B) 5  $\mu$ m, (C) 10  $\mu$ m. DNA is stained with DAPI. (D) Total number of genes and (E) percentage of mitochondrial genes in *PPO6*<sup>high</sup> and *PPO6*<sup>low</sup> populations. A gene was considered present when at least one count was measured in at least one cell. Boxplots indicate the median, first and third quartile, and min and max values.

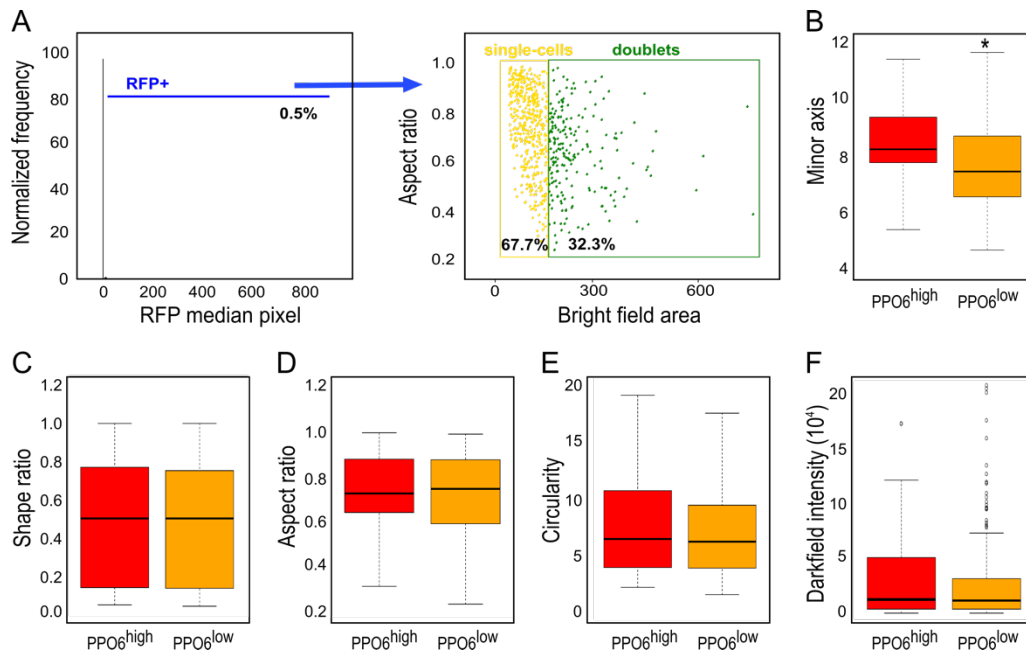

**Figure S4: Imaging flow cytometry analyses of PPO6<sup>high</sup> and PPO6<sup>low</sup> cell subpopulations.** Related to Figure 4. (A) Flow cytometry gating approach to identify RFP-positive single blood cells. Numbers indicate the percentages of events per gate (n=130,000). Single-cells and doublets were identified after initial gating based on RFP median pixel (blue arrow). (B-F) Boxplots showing distribution of morphological measurements according to the groups. Asterisks represent p < 0.01 based on Mann–Whitney–Wilcoxon comparisons. Boxplots indicate the median, first and third quartile, and min and max values.

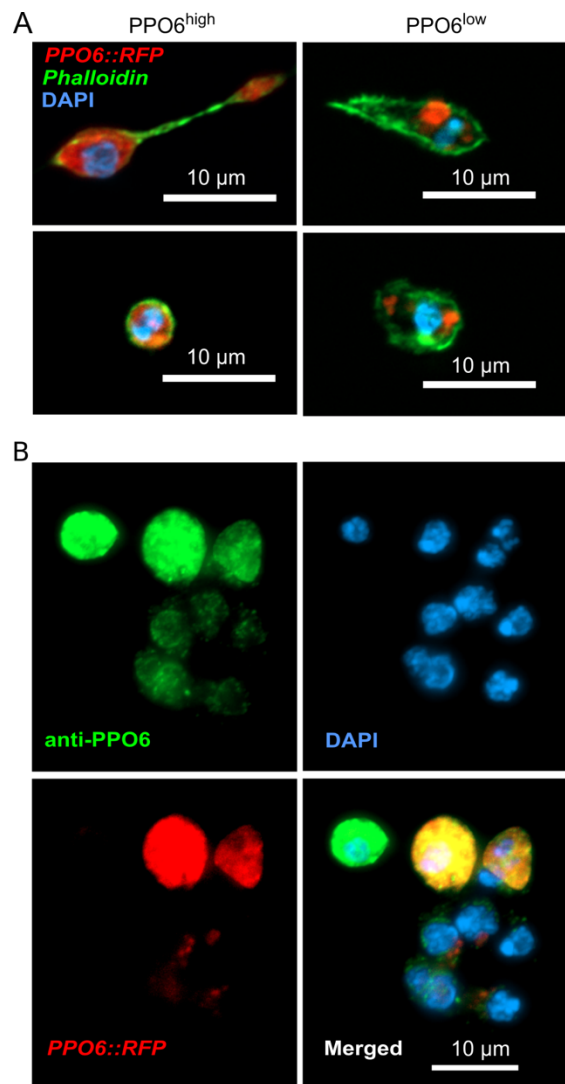

**Figure S5: Characterization of PPO6 subpopulations by fluorescence microscopy upon cell attachment.** RFP-expressing hemocytes (red) were obtained by perfusion of female adults and allowed to attach onto microscopy glasses. Cells were classified as PPO6<sup>high</sup> (left panel) or PPO6<sup>low</sup> (right panel) according to the expression of RFP (red). (A) PPO6<sup>high</sup> and PPO6<sup>low</sup> cell subpopulations exhibit different morphologies across the groups. Phalloidin staining indicates attachment foci and pseudopodia. (B) Cells were stained with anti-PPO6 antibodies for comparison to the RFP expression. A cell can display PPO6 staining but lack RFP expression. Scale bars: 10 μm. DNA is stained with DAPI. Representative images of 2 independent experiments are shown.

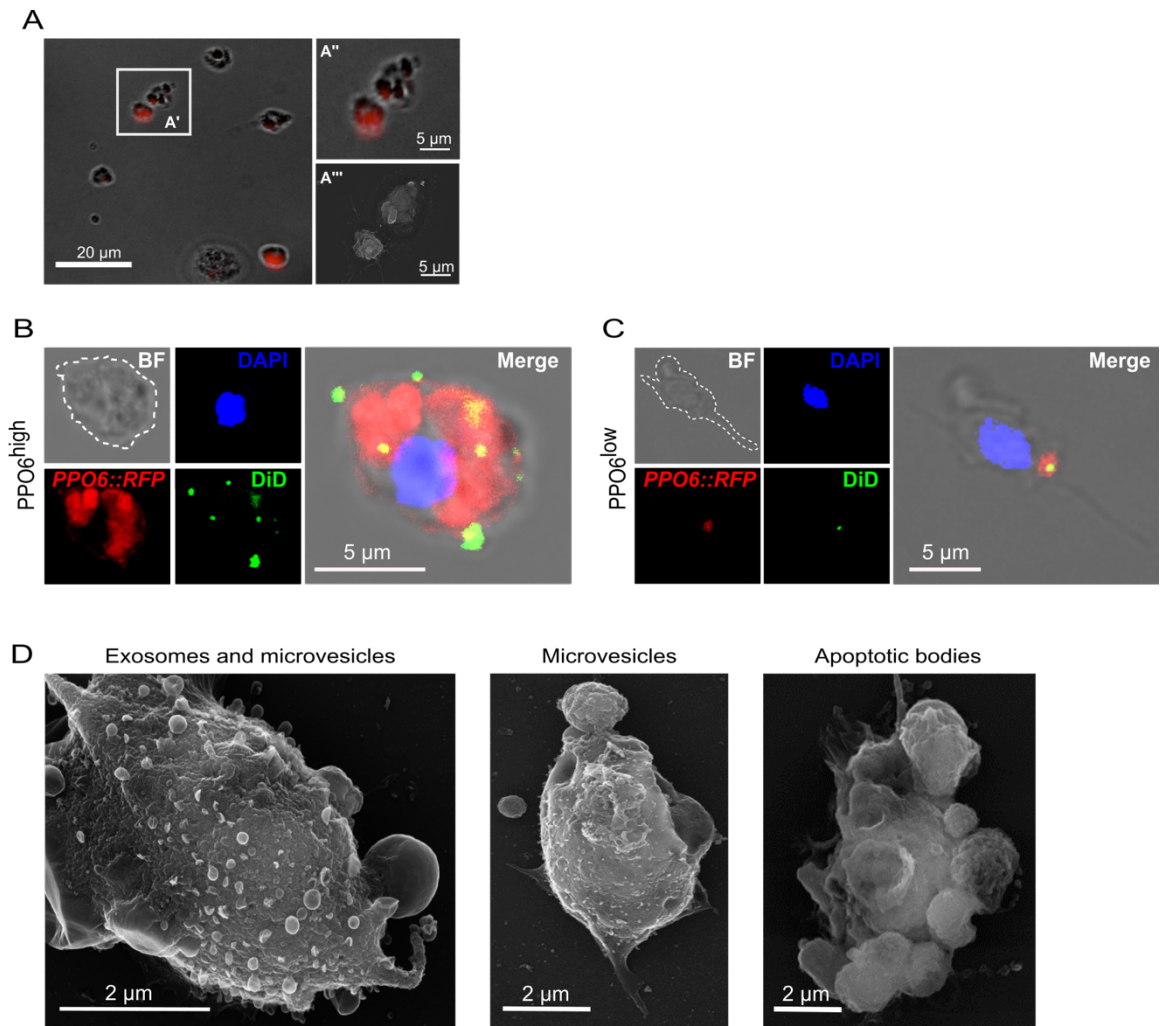

**Figure S6: Vesicular structures in mosquito hemocytes.** Related to Figure 5. (A-A''') Correlative fluorescence and scanning electron microscopy (SEM) of RFP-expressing cells obtained by hemolymph perfusion. (B)  $\text{PPO6}^{\text{high}}$  and (C)  $\text{PPO6}^{\text{low}}$  cell subpopulations display DiD fluorescence suggestive of vesicles. (D) Representative SEM images of mosquito blood cells displaying exosomes, microvesicles and apoptotic bodies. Scale bars: (A) 20  $\mu\text{m}$ , (A''-C) 5  $\mu\text{m}$ , (D) 2  $\mu\text{m}$ . DNA is stained with DAPI.



**Table S1: Alignment statistics for all sequenced libraries.**

| <b>Well</b> | <b>Sample</b> | <b>Total number of reads</b> | <b>Number of mapped reads</b> | <b>Unique mapping reads</b> | <b>Multiple mapping reads</b> | <b>Unmapped reads</b> |
|-------------|---------------|------------------------------|-------------------------------|-----------------------------|-------------------------------|-----------------------|
| <b>A1</b>   | <b>Pool 1</b> | 5615688                      | 5060145                       | 4729439                     | 330706                        | 555543                |
| <b>A2</b>   | <b>Pool 2</b> | 6481103                      | 5553377                       | 4897255                     | 656122                        | 927726                |
| <b>A4</b>   | <b>SC1</b>    | 5274357                      | 4761977                       | 4421679                     | 340298                        | 512380                |
| <b>A5</b>   | <b>SC2</b>    | 4138770                      | 3653831                       | 3400144                     | 253687                        | 484939                |
| <b>A6</b>   | <b>SC3</b>    | 5448767                      | 4863893                       | 4528385                     | 335508                        | 584874                |
| <b>A7</b>   | <b>SC4</b>    | 5784480                      | 5165299                       | 4933024                     | 232275                        | 619181                |
| <b>B8</b>   | <b>SC5</b>    | 2357650                      | 2099445                       | 1954616                     | 144829                        | 258205                |
| <b>C1</b>   | <b>SC6</b>    | 6285191                      | 5246147                       | 4894194                     | 351953                        | 1039044               |
| <b>C3</b>   | <b>SC7</b>    | 4401499                      | 3822267                       | 3519586                     | 302681                        | 579232                |
| <b>C7</b>   | <b>SC8</b>    | 4620786                      | 3909509                       | 3641622                     | 267887                        | 711277                |
| <b>C8</b>   | <b>SC9</b>    | 3459264                      | 3159000                       | 2974689                     | 184311                        | 300264                |
| <b>D1</b>   | <b>SC10</b>   | 5595460                      | 4723182                       | 4395667                     | 327515                        | 872278                |
| <b>D3</b>   | <b>SC11</b>   | 4546394                      | 4032611                       | 3744325                     | 288286                        | 513783                |
| <b>D4</b>   | <b>SC12</b>   | 4814842                      | 4147753                       | 3866959                     | 280794                        | 667089                |
| <b>D5</b>   | <b>SC13</b>   | 4129338                      | 3740817                       | 3526535                     | 214282                        | 388521                |
| <b>D9</b>   | <b>SC14</b>   | 4664492                      | 4144974                       | 3955985                     | 188989                        | 519518                |
| <b>E4</b>   | <b>SC15</b>   | 4456352                      | 3820728                       | 3531385                     | 289343                        | 635624                |
| <b>F10</b>  | <b>SC16</b>   | 5444609                      | 4545799                       | 4297554                     | 248245                        | 898810                |
| <b>F1</b>   | <b>SC17</b>   | 4606035                      | 3991175                       | 3693107                     | 298068                        | 614860                |
| <b>F3</b>   | <b>SC18</b>   | 4647533                      | 4070486                       | 3607177                     | 463309                        | 577047                |
| <b>F5</b>   | <b>SC19</b>   | 4961559                      | 4244663                       | 3866505                     | 378158                        | 716896                |
| <b>F6</b>   | <b>SC20</b>   | 3880894                      | 3440424                       | 3228198                     | 212226                        | 440470                |
| <b>F7</b>   | <b>SC21</b>   | 4754095                      | 4297398                       | 4059186                     | 238212                        | 456697                |
| <b>F9</b>   | <b>SC22</b>   | 4602225                      | 3978043                       | 3745810                     | 232233                        | 624182                |
| <b>G1</b>   | <b>SC23</b>   | 4553910                      | 3744282                       | 3501359                     | 242923                        | 809628                |
| <b>G3</b>   | <b>SC24</b>   | 3776579                      | 3339027                       | 3115424                     | 223603                        | 437552                |
| <b>G4</b>   | <b>SC25</b>   | 6662345                      | 5611870                       | 5226449                     | 385421                        | 1050475               |
| <b>H4</b>   | <b>SC26</b>   | 4202565                      | 3771295                       | 3502259                     | 269036                        | 431270                |

**Table S2: Fisher’s discriminant factor results obtained from the comparison between all parameters analyzed for PPO6<sup>high</sup> and PPO6<sup>low</sup> blood cell populations.**

| <b>Features</b>                                 | <b>RD Mean (ppo_high,ppo_low)</b> |
|-------------------------------------------------|-----------------------------------|
| <b>Width RFP</b>                                | 1.7                               |
| <b>Minor Axis RFP</b>                           | 1.69                              |
| <b>Thickness Maximum RFP</b>                    | 1.63                              |
| <b>Modulation RFP</b>                           | 1.4                               |
| <b>Median Pixel RFP</b>                         | 1.24                              |
| <b>Mean Pixel RFP</b>                           | 1.14                              |
| <b>Intensity RFP</b>                            | 1.11                              |
| <b>Bright Detail Intensity R7 RFP</b>           | 1.08                              |
| <b>Standard Deviation RFP</b>                   | 1.03                              |
| <b>Circularity RFP</b>                          | 0.92                              |
| <b>Symmetry 3 RFP</b>                           | 0.41                              |
| <b>Symmetry 4 RFP</b>                           | 0.45                              |
| <b>Bright Detail Similarity R3 RFP</b>          | 0.18                              |
| <b>Delta Centroid XY RFP Intensity Weighted</b> | 0.16                              |
| <b>Saturation Count BF</b>                      | 0                                 |
| <b>Saturation Percent BF</b>                    | 0                                 |
| <b>Diameter Adaptive Erode BF</b>               | 0                                 |
| <b>Spot Area Minimum Adaptive Erode BF</b>      | 0                                 |

**Additional datasets (separate Excel files)**

**Dataset S1: Mosquito blood cell transcriptome based on scRNA-seq of pools and single hemocytes.**

**Dataset S2: Genes expressed in at least 90% of the single-cells.**

**Dataset S3: Gene ontologies for genes identified in all samples (Dataset S2).**

**Dataset S4: Highly variable genes identified in the single-cells based on technical noise estimation.**

**Dataset S5: Gene ontologies for PPO6<sup>high</sup> blood cell population.**

**Dataset S6: Gene ontologies for PPO6<sup>low</sup> blood cell population.**

**Dataset S7: Morphological parameters analyzed for the 319 cells using imaging flow cytometry.**
